# Supplementary material for: Malnutrition Aggravates Alterations Observed in the Gut Structure and Immune Response of Mice Infected with Leishmania infantum
Source: MDPI journal article supplement (doi:10.3390/microorganisms9061270), 2021-06-11
Supplement: s1 [file s1]

## **Legends to supplementary figures**

**Supplementary figure 1.** Analysis of IgA distribution in the duodenum of malnourished BALB / c mice infected with *Leishmania infantum*. (A) Representative images of tissue IgA (green) detected by immunofluorescence in sections of duodenum from different experimental groups. The cell nuclei were marked with DAPI (blue). n = 4 animals per group. 10X increase. (B) Quantitative analysis of tissue IgA+ area. IgA levels are expressed as a percentage of the marked area. Significant differences due to infection (b)  $p < 0.001$ , and interaction of diet and infection (c)  $p < 0.01$ .

**Supplementary Table S1.** Sequences of primers used for real time qPCR

**Supplementary Table S2.** Score values for histological alterations in the intestinal tissue
