# Supplementary material for: Malnutrition Aggravates Alterations Observed in the Gut Structure and Immune Response of Mice Infected with Leishmania infantum
Source: MDPI journal article supplement (doi:10.3390/microorganisms9061270), 2021-06-11
Supplement: s1 [file s1]

**Supplementary Table S1.** Sequences of primers used for real time qPCR

| Accession Number   | Target                         | Forward Primer           | Reverse Primer           | Product size (bp) | Slope | Efficiency (E) (%) | Correlation coefficient (R <sup>2</sup> ) |
|--------------------|--------------------------------|--------------------------|--------------------------|-------------------|-------|--------------------|-------------------------------------------|
| NM_010548.2        | <i>IL-10</i>                   | ACAACATACTGCTAACCGACTCCT | GGCAACCCAAGTAACCCTTAAAGT | 57                | 3.15  | 108                | 0.97                                      |
| NM_008351.3        | <i>IL-12</i>                   | CTCTCATATTCACTATACAAGTTG | GCTCTTCTGCTAACACAT       | 94                | 3.29  | 101                | 0.80                                      |
| NM_010552.3        | <i>IL-17A</i>                  | TCTGTTCTCATCCAGCAAGA     | ATCTTCTCGACCCTGAAAGT     | 80                | 3.27  | 102                | 0.94                                      |
| NM_008337.3        | <i>IFN-<math>\gamma</math></i> | AGGACACAACAAGATGGA       | TTAGTGAGAGTGAACATTACAG   | 141               | 3.32  | 100                | 0.92                                      |
| NM_00127860<br>1.1 | <i>TNF-<math>\alpha</math></i> | CTTCCTACCTTCAGACCTT      | GCCTTCCAAATAAATACATTCAT  | 153               | 2.60  | 120                | 0.97                                      |
| NM_011577.1        | <i>TGF-<math>\beta</math></i>  | ATTCCTGGCGTTACCTTGG      | CCTGTATTCCGTCTCCTTGG     | 117               | 2.46  | 155                | 0.75                                      |
| NM_025567.2        | <i>Cyc1</i>                    | GGTGTCATTGCGAGAAGG       | GGTGCCATCATCATACTCC      | 106               | 3.32  | 100                | 0.99                                      |
| NM_016774.3        | <i>ATP<math>\beta</math>5</i>  | TGAGTGTTGAGCAGGAGATTC    | TTGGCGACATTGTTGATTAGC    | 148               | 3.39  | 97                 | 0.99                                      |
| NM_013556.2        | <i>H RTP</i>                   | CGTGATTAGCGATGATGAACC    | AAGTCTTTCAGTCCTGTCCA     | 124               | 3.00  | 107                | 0.99                                      |
| AF285161.1         | <i>UBC</i>                     | CTGTGAGAGCCGTGGATATTGG   | GCACTTCCGTCTTTCAGCAAA    | 84                | 3.47  | 94                 | 0.98                                      |
| AF169140.1         | <i>kDNA</i>                    | TGTTGGTTGTGTGACTTTA      | CATCCCACCAGACTAATC       | 74                | 2.99  | 115                | 0.99                                      |
