# Supplementary material for: Malnutrition Aggravates Alterations Observed in the Gut Structure and Immune Response of Mice Infected with Leishmania infantum
Source: Microorganisms. 2021 Jun 11;9(6):1270. doi: 10.3390/microorganisms9061270 (PMC8230684; doi:10.3390/microorganisms9061270)
Supplement: Supplementary file 1 [file microorganisms-09-01270-s001.zip]

Archive with 4 entries (4 files):
- Legends to supplementary figures.pdf
- Supplementary figure 1.tif
- Supplementary Table 1.pdf
- Supplementary Table 2.xlsx
