# Supplementary material for: Malnutrition Aggravates Alterations Observed in the Gut Structure and Immune Response of Mice Infected with Leishmania infantum
Source: Microorganisms. 2021 Jun 11;9(6):1270. doi: 10.3390/microorganisms9061270 (PMC8230684; doi:10.3390/microorganisms9061270)
Supplement: Supplementary file 1 [file microorganisms-09-01270-s001.zip › Supplementary Table 2.xlsx]

## Sheet: supplementary table 1
		Supplementary table S2. Score values for histological alterations in the intestinal tissue
			Type of alteration		Score
			Cellular
			Lymphocytic/ lymphoplasmacytic inflammatory infiltrate in lamina propria	Mild	1
				Moderate	2
				Transmural	3
			Lymphocytic/lymphoplamacytic inflammatory infiltrate in submucose (SM)	Mild	1
				Moderate	2
			Neutrophil, macrophage or plasma cell infiltrates		1
			Lymphoid hyperplasia		1
			No alterations		0
			Structural
			Villus atrophy		1
			Ulcers		1
			Thickening of mucosa		1
			No alterations		0
